# Supplementary material for: Inferring subunit stoichiometry from single molecule photobleaching
Source: PubMed Central journal article supplement — J Gen Physiol. 2013 Jun;141(6):737–46. doi: 10.1085/jgp.201310988 (PMC3664702; doi:10.1085/jgp.201310988), 2013-06
Supplement: supp_jgp.201310988_JGP_201310988_sm.pdf [file supp_jgp.201310988_JGP_201310988_sm.pdf]

Hines, <http://www.jgp.org/cgi/content/full/jgp.201310988/DC1>

A TXT file contains functions written in R that can be used to implement the methods described in the Results and discussion.

A separate PDF file provides a walk-through for the use of the R language and the analysis functions contained in the TXT file.

A CSV file contains simulated data in a comma-separated format; it is used to illustrate how to import and analyze data using the methods contained in the TXT file.
